# Supplementary material for: Genomes of endangered great hammerhead and shortfin mako sharks reveal historic population declines and high levels of inbreeding in great hammerhead
Source: PubMed Central journal article supplement — iScience. 2022 Dec 17;26(1):105815. doi: 10.1016/j.isci.2022.105815 (PMC9826928; doi:10.1016/j.isci.2022.105815), 2022-12-17
Supplement: mmc1.pdf [file mmc1.pdf]

**Supplemental information**

**Genomes of endangered great hammerhead and  
shortfin mako sharks reveal historic population declines  
and high levels of inbreeding in great hammerhead**

**Michael J. Stanhope, Kristina M. Ceres, Qi Sun, Minghui Wang, Jordan D. Zehr, Nicholas J. Marra, Aryn P. Wilder, Cheng Zou, Andrea M. Bernard, Paulina Pavinski-Bitar, Mitchell G. Lokey, and Mahmood S. Shivji**

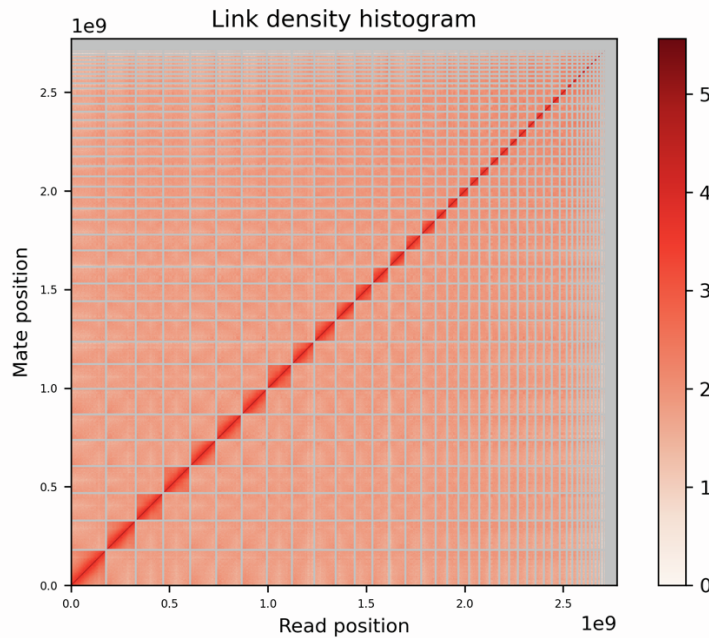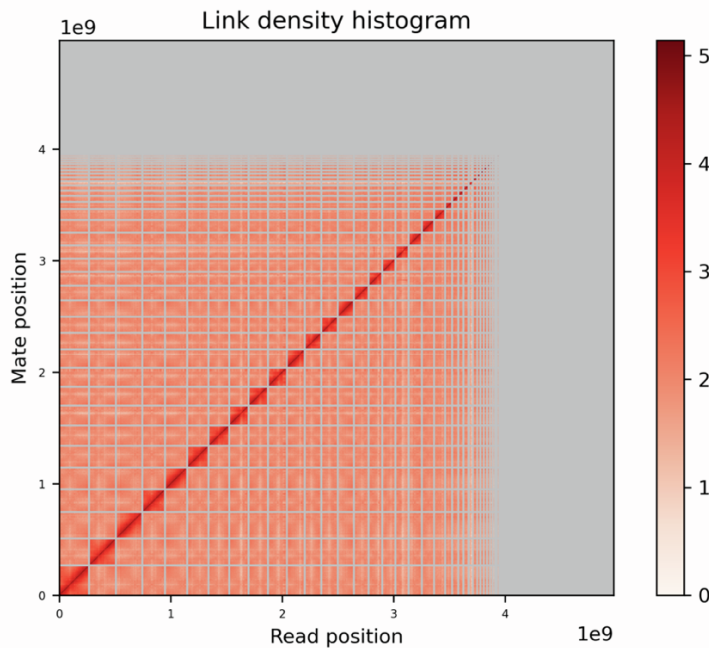

**Figure S1. Link Density histogram plots from Dovetail HiRise assemblies for great hammerhead and shortfin mako.** These plots depict the contiguity of the genome assemblies for **Top**: great hammerhead (Hi-C scaffolding); **Bottom**: shortfin mako (Omni-C scaffolding). The x and y axes give the mapping positions of the first and second read in the read pair respectively, grouped into bins. The axes are in gigabases of the genome assembly and the color scale is log scale of Hi-C/Omni-C density at each point; contact matrices were generated with Juicebox<sup>1</sup>. The horizontal and vertical lines indicate borders between scaffolds, which are organized along the diagonal from largest to smallest. Scaffolds less than 1Mbp are excluded.

| Category                | VGP Metric             | Hammerhead                     | Mako                           |
|-------------------------|------------------------|--------------------------------|--------------------------------|
| Continuity              | Contig (NG50)          | 44.5Mbp                        | 4.16Mbp                        |
|                         | Scaffolds (NG50)       | 89.8Mbp                        | 145.5Mbp                       |
|                         | Gaps / Gbp             | 863                            | 367                            |
| Structural accuracy     | Reliable blocks        | 2.67 Gbp                       | 3.40 Gbp                       |
|                         | False duplications     | 2.5%                           | 3.8%                           |
| Base accuracy           | Base pair QV           | 38.97                          | infinity                       |
|                         | k-mer completeness     | 96.4%                          | 100%                           |
| Haplotype phasing       | Phase block NG50       | null                           | null                           |
| Functional completeness | Genes (BUSCO complete) | 94.2%                          | 90.6%                          |
|                         | Transcript mappability | 92.84%                         | 97.07%                         |
| Chromosome status       | Assigned %             | 98%                            | 81%                            |
|                         | sex chromosomes        | null                           | null                           |
|                         | organelles (MT)        | 1 complete allele <sup>2</sup> | 1 complete allele <sup>3</sup> |

**Table S1. Great hammerhead and shortfin mako genome assembly metrics.** Metrics for great hammerhead and shortfin mako that meet or exceed the quality category “VGP-2016”, established by the Vertebrate Genome Project (VGP), as a minimum for chromosomal assembly<sup>4</sup>, are indicated in red. These various metrics were calculated using the VGP working group’s genome assembly evaluation pipeline (<https://github.com/VGP/vgp-assembly/tree/master/pipeline>). The mitochondrial alleles come from earlier studies of ours; in the case of hammerhead<sup>2</sup> from a different individual than this genome sequence; in the case of mako<sup>3</sup> from this same individual.

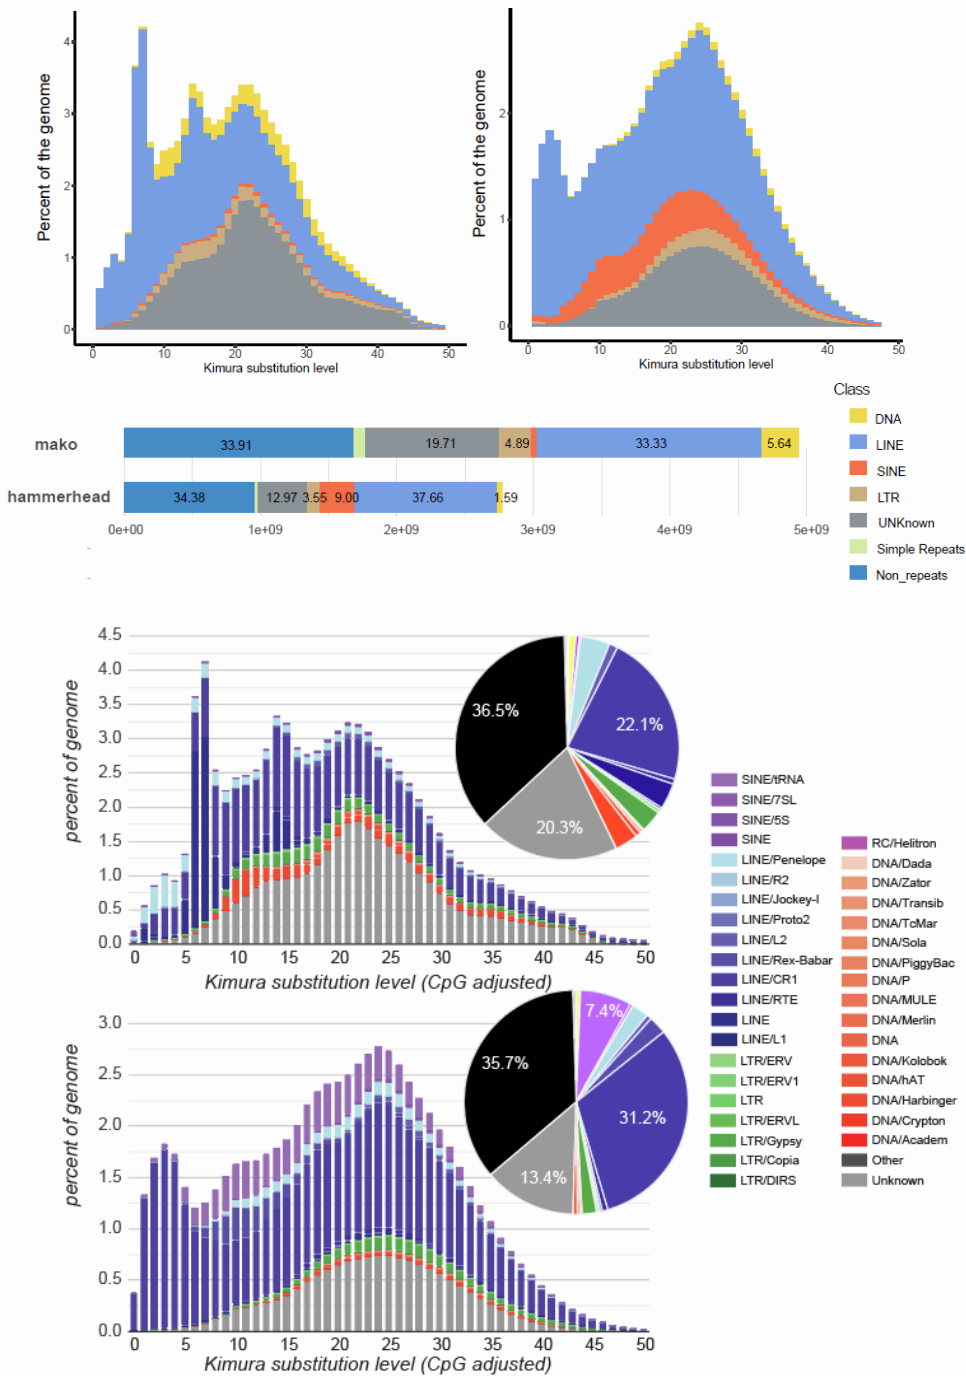

**Figure S2. Composition of repetitive elements in the shortfin mako and great hammerhead genomes.** **Top:** The overall landscape of major classes of transposable elements: shortfin mako on the left, great hammerhead on the right. **Middle:** The overall composition of repetitive elements for the entire genome for both species. The length of each box is proportional to their representation in the genome, and the number on the box indicates the percentage of each type of element in the genome. **Bottom:** More specific breakdown of repetitive elements from both genomes; shortfin mako on the top, great hammerhead on the bottom. The relative ages of different transposable elements can be inferred by the Kimura distance to their consensus sequences.

| Species                              | Data type             | Accession                            |
|--------------------------------------|-----------------------|--------------------------------------|
| <i>Carcharodon carcharias</i>        | Genome assembly       | GCA_003604245.1                      |
|                                      | Genome sequence reads | SRR7693855, SRR7693869<br>SRR7693858 |
| <i>Chiloscyllium punctatum</i>       | Genome assembly       | GCA_003427335.1                      |
|                                      | Genome sequence reads | DRR111842, DRR111844                 |
| <i>Scyliorhinus torazame</i>         | Genome assembly       | GCA_003427355.1                      |
|                                      | Genome sequence reads | DRR111851, DRR111854<br>DRR111848    |
| <i>Rhincodon typus</i> (Ralph)       | Genome assembly       | GCA_001642345.3                      |
|                                      | Genome sequence reads | SRR1521192, SRR1521195<br>SRR1521198 |
| <i>Rhincodon typus</i> (KOGIC-WS-01) | Genome assembly       | GCA_013626285.1                      |
|                                      | Genome sequence reads | SRR7614630, SRR7614623<br>SRR7614624 |

**Table S2. Genome data accession numbers for published sequences used for heterozygosity and PSMC analyses.**

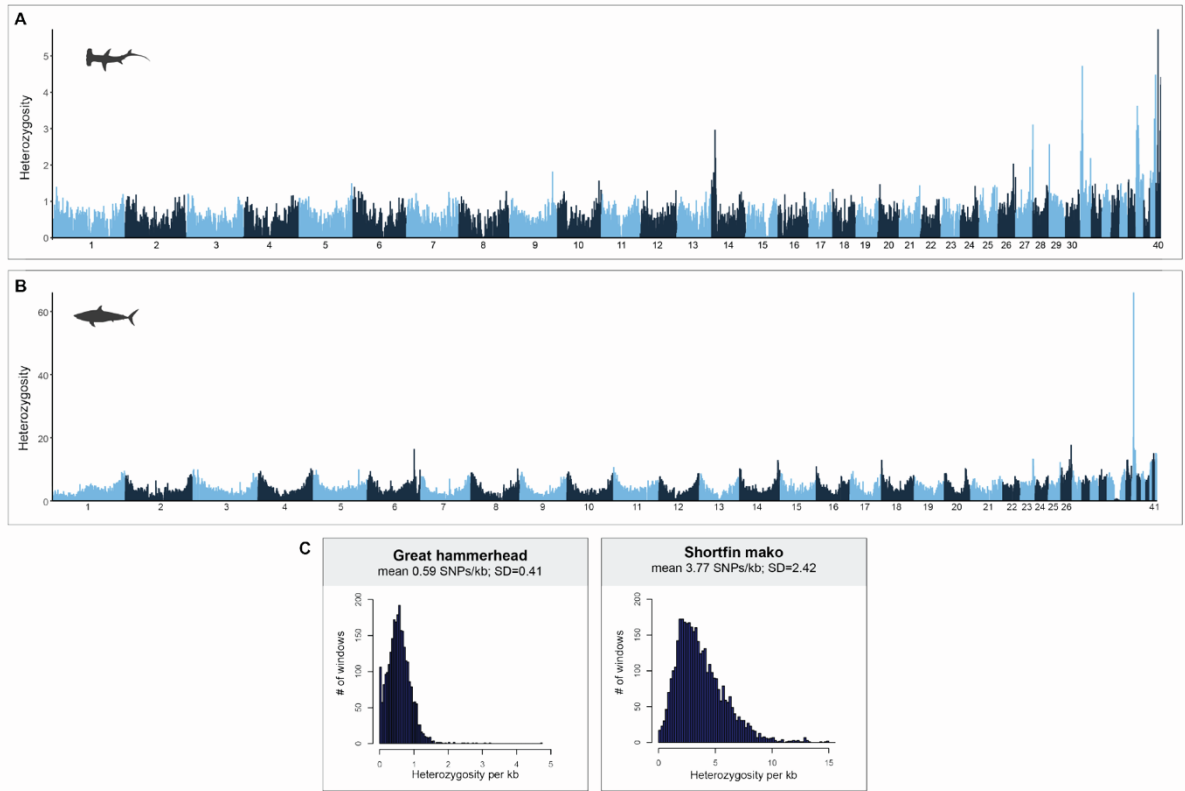

**Figure S3. Genome wide heterozygosity calculated in nonoverlapping 1Mbp windows for great hammerhead and shortfin mako genomes.** A. the 40 pseudo-chromosomes of the great hammerhead genome; B. the 41 pseudo-chromosomes of the shortfin mako genome; note differences in Y axis scale between the two sharks. C. Histograms for the per window heterozygosity for each of these species.

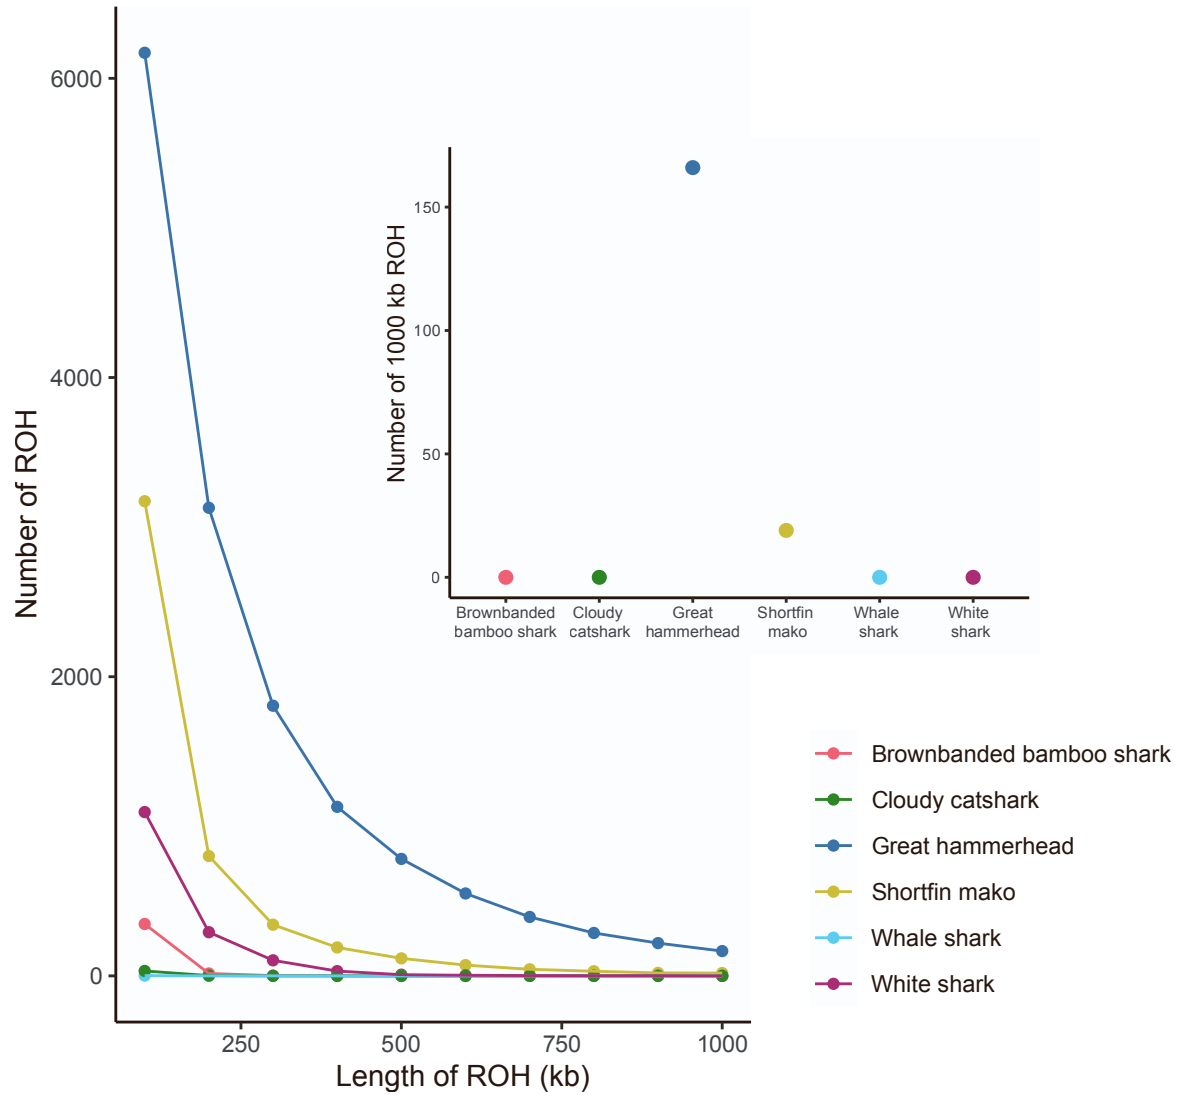

**Figure S4. Comparative numbers of ROH of varying lengths between different species of sharks for the largest 24 scaffolds of each species.** The whale shark here is KOGIC-WS-01<sup>5</sup>, chosen because of its higher scaffold N50 statistic versus the other whale shark<sup>6</sup>.

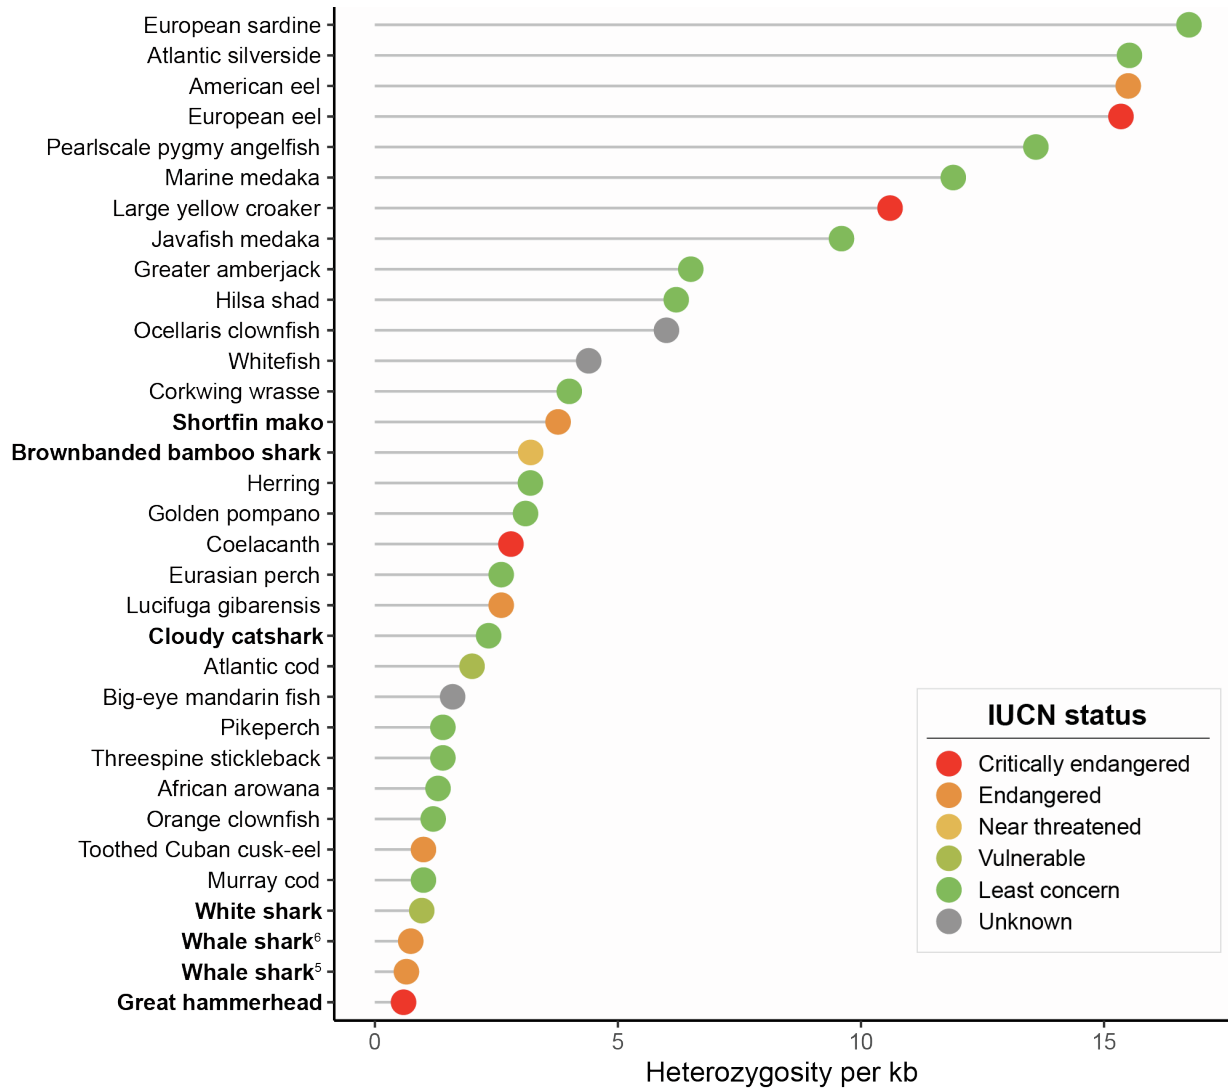

**Figure S5. Genome wide heterozygosity of shark species compared to other species of fish.** Estimates for white shark, brownbanded bamboo shark, whale shark, and cloudy catshark come from the largest 24 scaffolds of those published genomes (Table S2) and for great hammerhead and shortfin mako are derived from the 40 and 41 pseudo-chromosomes for each of those species. Data for the remaining fish species come from<sup>7</sup>.



### Supplementary References

1. Durand N.C., Robinson J.T., Shamim M.S., Machol I., Mesirov J.P., Lander E.S., et al. Juicebox provides a visualization system for Hi-C contact maps with unlimited zoom. *Cell Syst.* 2016;3:99–101. doi:10.1016/j.cels.2015.07.012.
2. Ruck C.L., Marra N., Shivji M.S., Stanhope M.J. The complete mitochondrial genome of the endangered great hammerhead shark, *Sphyrna mokarran*. *Mitochondrial DNA. B Resour.* 2017;2:246–248. doi:10.1080/23802359.2017.1318682.
3. Gorman J., Marra N., Shivji M.S., Stanhope M.J. The complete mitochondrial genome of an atlantic ocean shortfin mako shark, *Isurus oxyrinchus*. *Mitochondrial DNA. B Resour.* 2019;4:3642–3643. doi:10.1080/23802359.2019.1677524.
4. Rhie A., McCarthy S.A., Fedrigo O., Damas J., Formenti G., Koren S., et al. Towards complete and error-free genome assemblies of all vertebrate species. *Nature* 2021;592:737–746. doi:10.1038/s41586-021-03451-0.
5. Weber J.A., Park S.G., Luria V., Jeon S., Kim H.M., Jeon Y., et al. The whale shark genome reveals how genomic and physiological properties scale with body size. *Proc. Natl. Acad. Sci. USA* 2020;117:20662–20671. doi:10.1073/pnas.1922576117.
6. Tan M., Redmond A.K., Dooley H., Nozu R., Sato K., Kuraku S., et al. The whale shark genome reveals patterns of vertebrate gene family evolution. *Elife* 2021;10:e65394. doi:10.7554/eLife.65394.
7. Tigano A., Jacobs A., Wilder A.P., Nand A., Zhan Y., Dekker J., et al. Chromosome-level assembly of the Atlantic Silverside genome reveals extreme levels of sequence diversity and structural genetic variation. *Genome Biol. Evol.* 2021;13:evab098. doi:10.1093/gbe/evab098.
